# Supplementary material for: Addition of Amaranth Flour of Different Particle Sizes at Established Doses in Wheat Flour to Achieve a Nutritional Improved Wheat Bread
Source: MDPI journal article supplement (doi:10.3390/foods12010133), 2022-12-27
Supplement: s1 [file s1]

**Table S1.** The mineral content of wheat flour (WF) compared to the large (L), medium (M) and small (S) particle size of amaranth flour

| Parameter                 | WF                         | Amaranth flour particle size |                             |                             |
|---------------------------|----------------------------|------------------------------|-----------------------------|-----------------------------|
|                           |                            | AL                           | AM                          | AS                          |
| Macro-elements (mg/100 g) |                            |                              |                             |                             |
| K                         | 108.50 ± 2.12 <sup>e</sup> | 295.10 ± 0.56 <sup>c</sup>   | 507.05 ± 18.31 <sup>a</sup> | 360.05 ± 14.14 <sup>b</sup> |
| Ca                        | 24.80 ± 0.10 <sup>d</sup>  | 83.03 ± 0.61 <sup>c</sup>    | 90.20 ± 2.72 <sup>c</sup>   | 197.66 ± 0.38 <sup>a</sup>  |
| Mg                        | 155.5 ± 0.65 <sup>b</sup>  | 159.8 ± 0.04 <sup>a</sup>    | 165.0 ± 0.26 <sup>a</sup>   | 166.00 ± 0.11 <sup>a</sup>  |
| Na                        | 7.33 ± 0.11 <sup>b</sup>   | 10.94 ± 1.04 <sup>a</sup>    | 11.42 ± 1.63 <sup>a</sup>   | 11.88 ± 1.14 <sup>a</sup>   |
| Micro-elements (mg/100 g) |                            |                              |                             |                             |
| Fe                        | 1.80 ± 0.06 <sup>e</sup>   | 2.95 ± 0.47 <sup>c</sup>     | 5.71 ± 0.98 <sup>b</sup>    | 5.73 ± 0.44 <sup>b</sup>    |
| Zn                        | 3.02 ± 0.25 <sup>b</sup>   | 5.88 ± 0.13 <sup>a</sup>     | 6.15 ± 0.34 <sup>a</sup>    | 6.49 ± 0.39 <sup>a</sup>    |
| Mn                        | 1.59 ± 0.10 <sup>e</sup>   | 1.80 ± 0.18 <sup>c</sup>     | 2.89 ± 0.68 <sup>bc</sup>   | 4.59 ± 0.52 <sup>ab</sup>   |
| Cu                        | 0.56 ± 0.01 <sup>e</sup>   | 0.62 ± 0.02 <sup>bc</sup>    | 0.81 ± 0.04 <sup>ab</sup>   | 0.95 ± 0.08 <sup>a</sup>    |

WF – wheat flour; AL – large particle size of amaranth flour; AM – medium particle size of amaranth flour; AS – small particle size of amaranth flour. Mean values on the same column followed by different letters are significantly different ( $p < 0.05$ ).

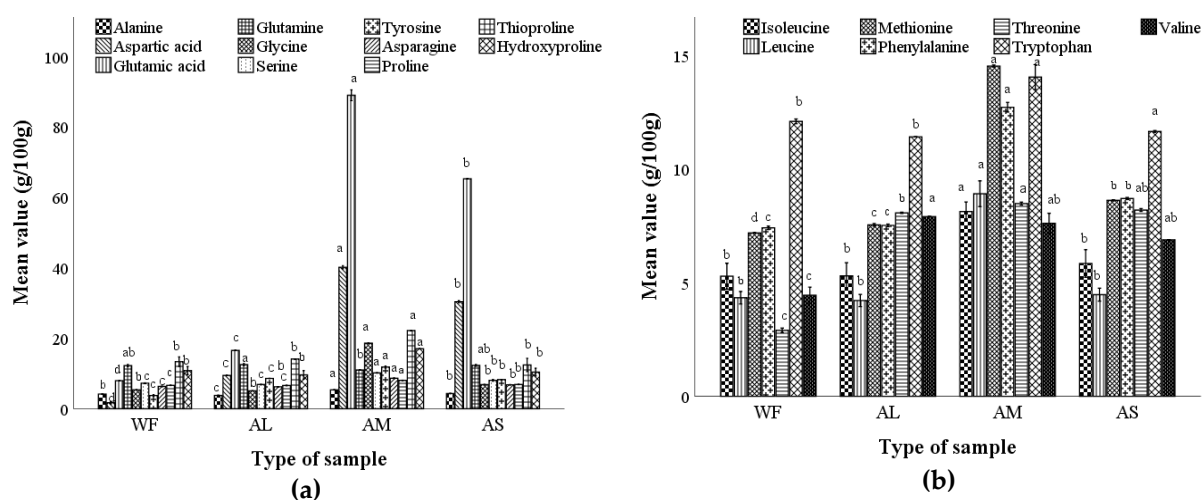

**Figure S1.** Essential (a) and non-essential (b) amino acid content of amaranth flour (AF) corresponding to large (L), medium (M) and small (S) particle size compared to wheat flour
